# Supplementary material for: The application of the Modified Band Approach for the calculation of on-line photodissociation rate constants in TM5: implications for oxidative capacity
Source: Copernicus journal article supplement (doi:10.5194/gmd-5-15-2012), 2012-01-06
Supplement: Supplementary file 1 [file gmd-5-15-2012-supplement.pdf]

**Supplementary material to:**

**The application of the Modified Band Approach for the  
calculation of on-line photodissociation rate constants  
in TM5: implications for oxidative capacity**

**J. E. Williams<sup>1</sup>, A. Strunk<sup>1</sup>, V. Huijnen<sup>1</sup> and M. van Weele<sup>1</sup>**

[1] {KNMI, Chemistry and Climate division, De Bilt, The Netherlands}

Correspondence to: J. E. Williams (williams@knmi.nl)

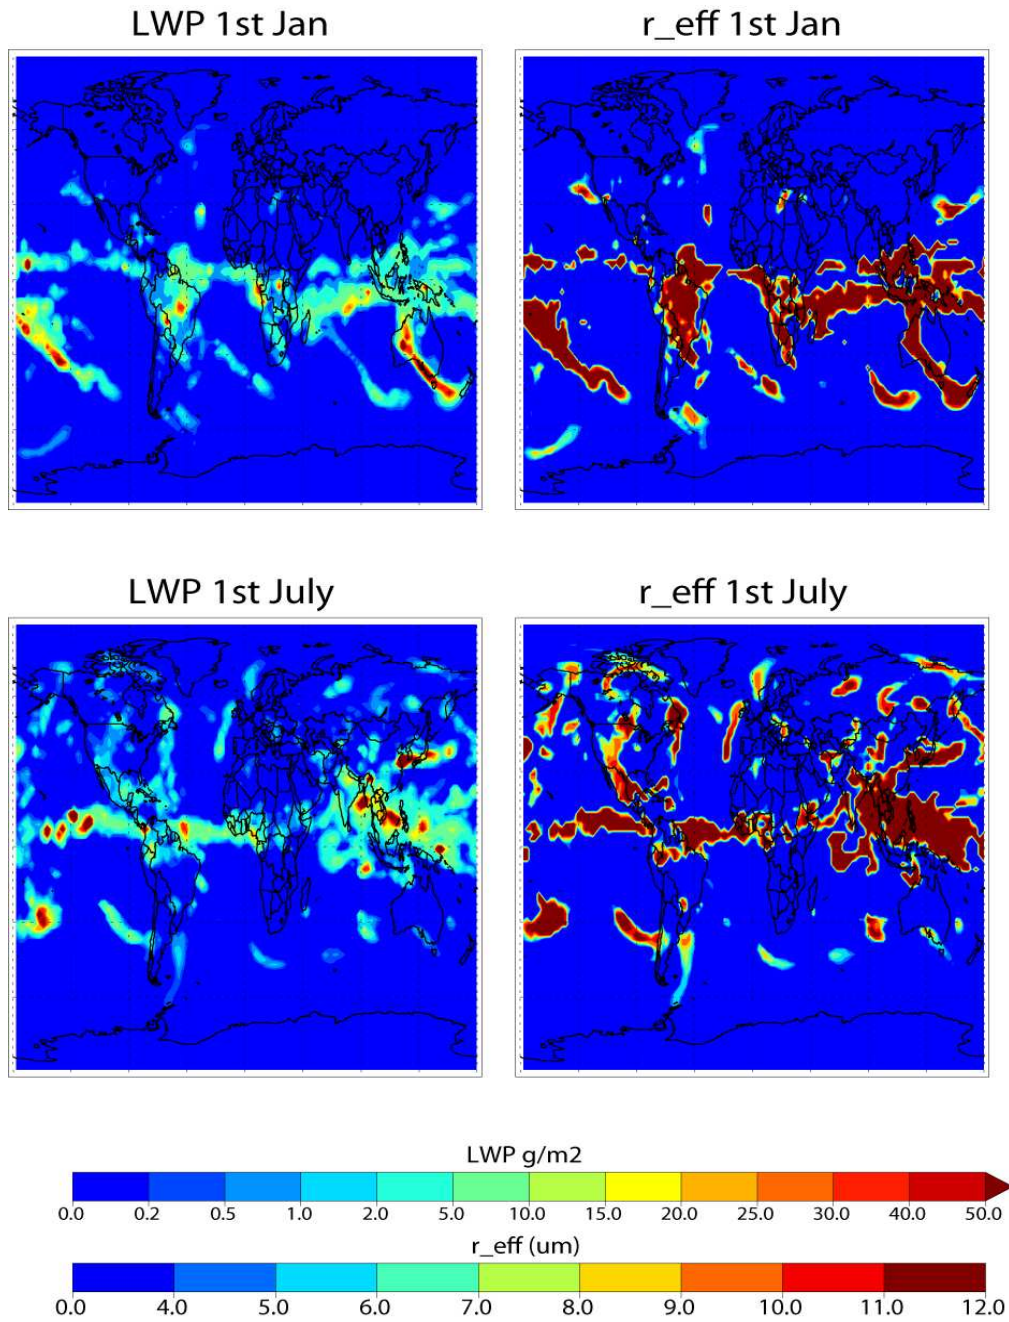

Figure S1a: The horizontal distribution of the partial Liquid Water Path and the effective cloud droplet radius for 1<sup>st</sup> January (top) and 1<sup>st</sup> July (bottom) at 945hPa as calculated using ERA-Interim meteorological data. The  $r_{eff}$  is calculated using the parameterization of McFarlane et al. (1992). The dark blue areas denote regions with insignificant cloud coverage.

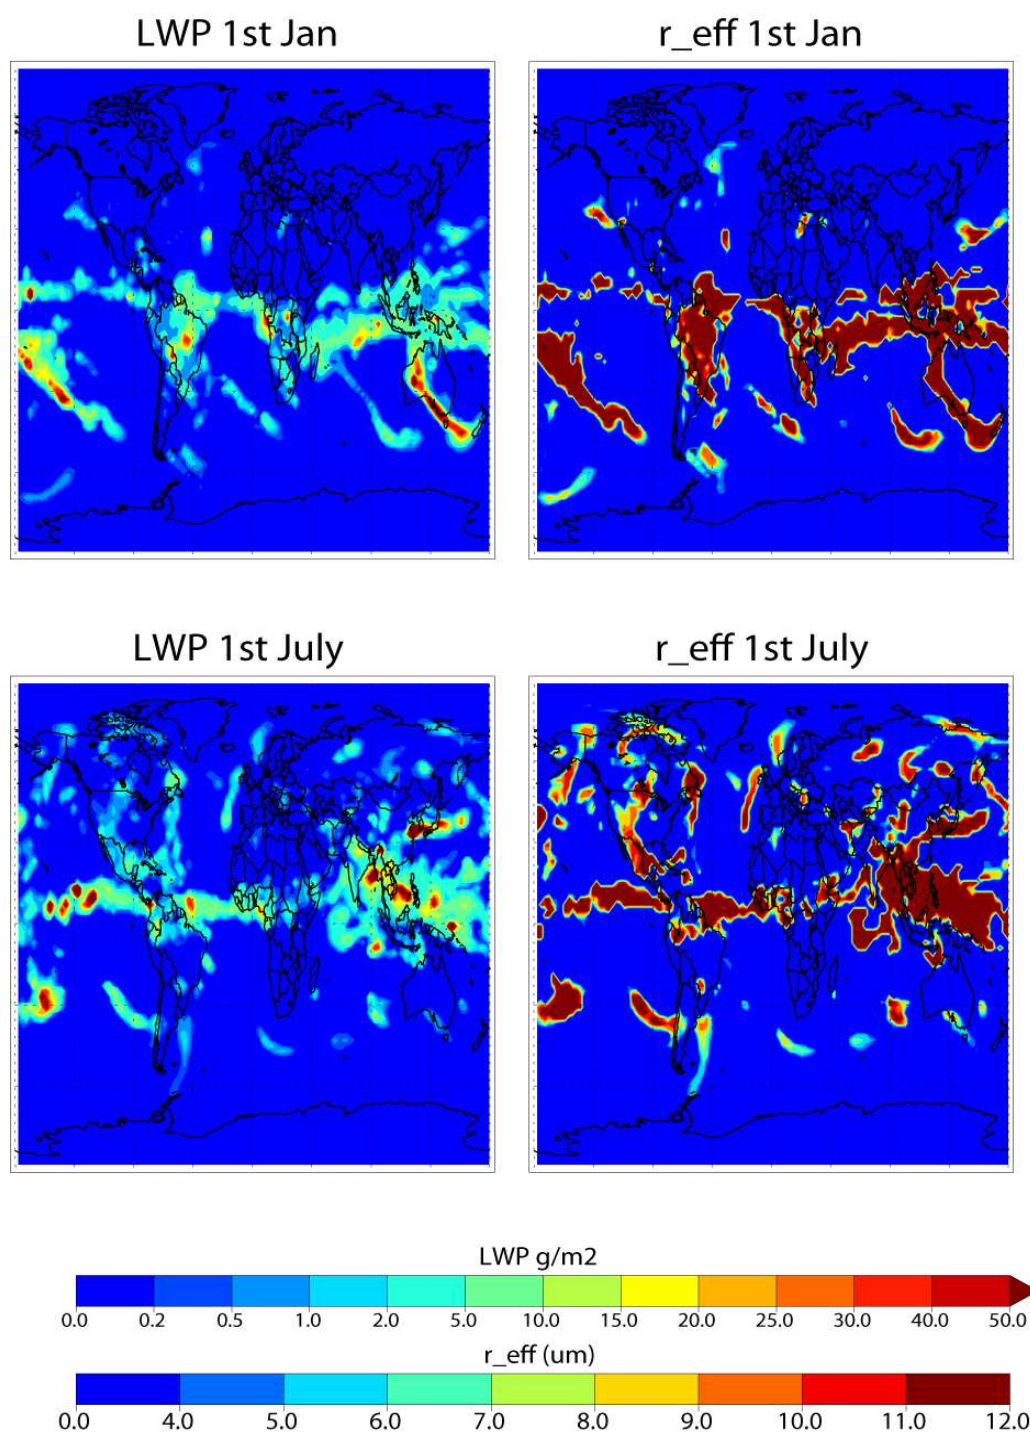

Figure S1b: As for Figure S1a except at 500hPa.

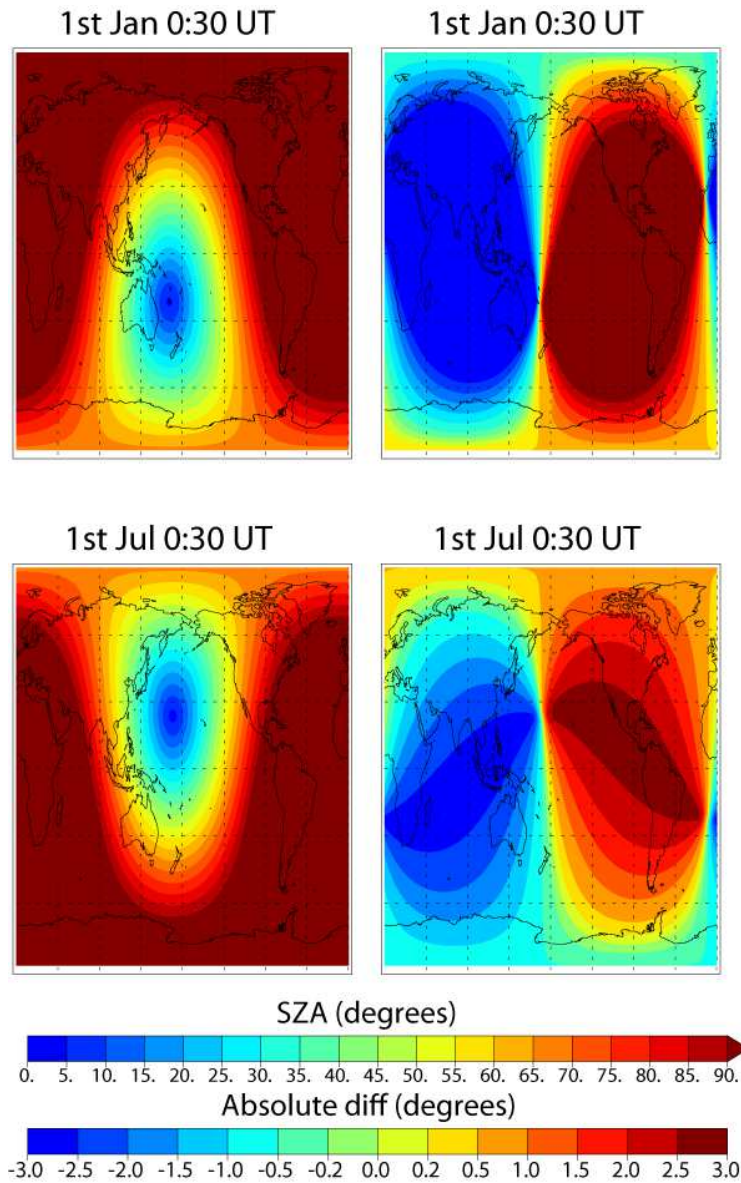

Figure S2: Instantaneous SZA calculated in the MBA at 24:00 UTC for (top left) January 1st and (bottom left) July 1st. The corresponding absolute differences are shown on the right as calculated from the MBA-BA.



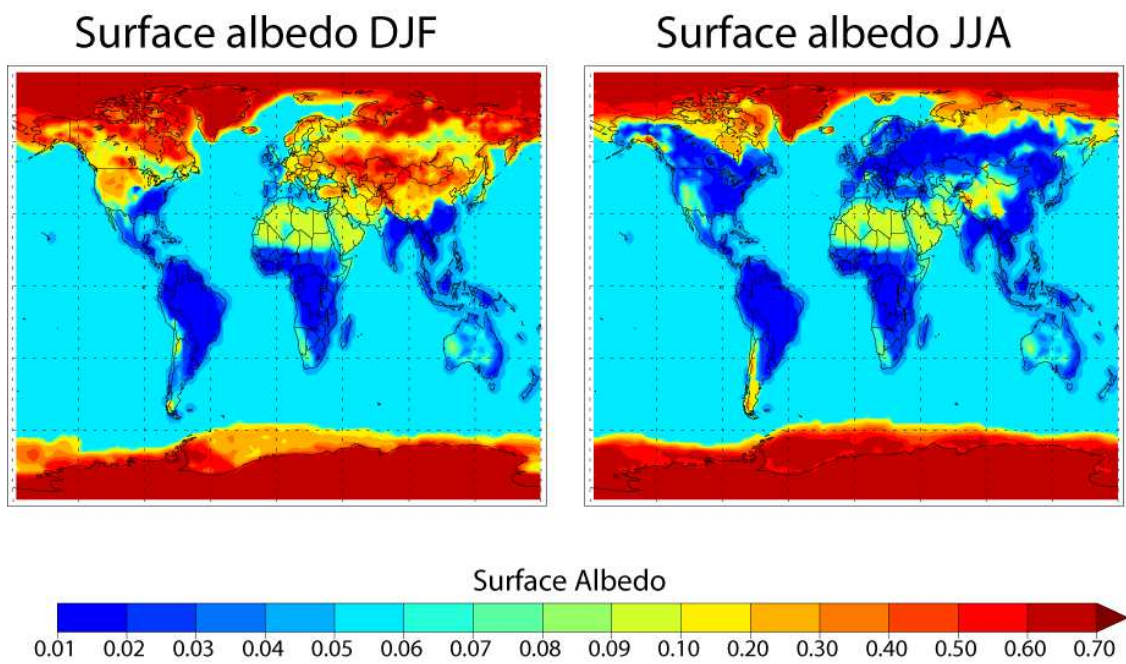

Figure S3: The seasonal distribution of surface albedo values calculated in TM5.

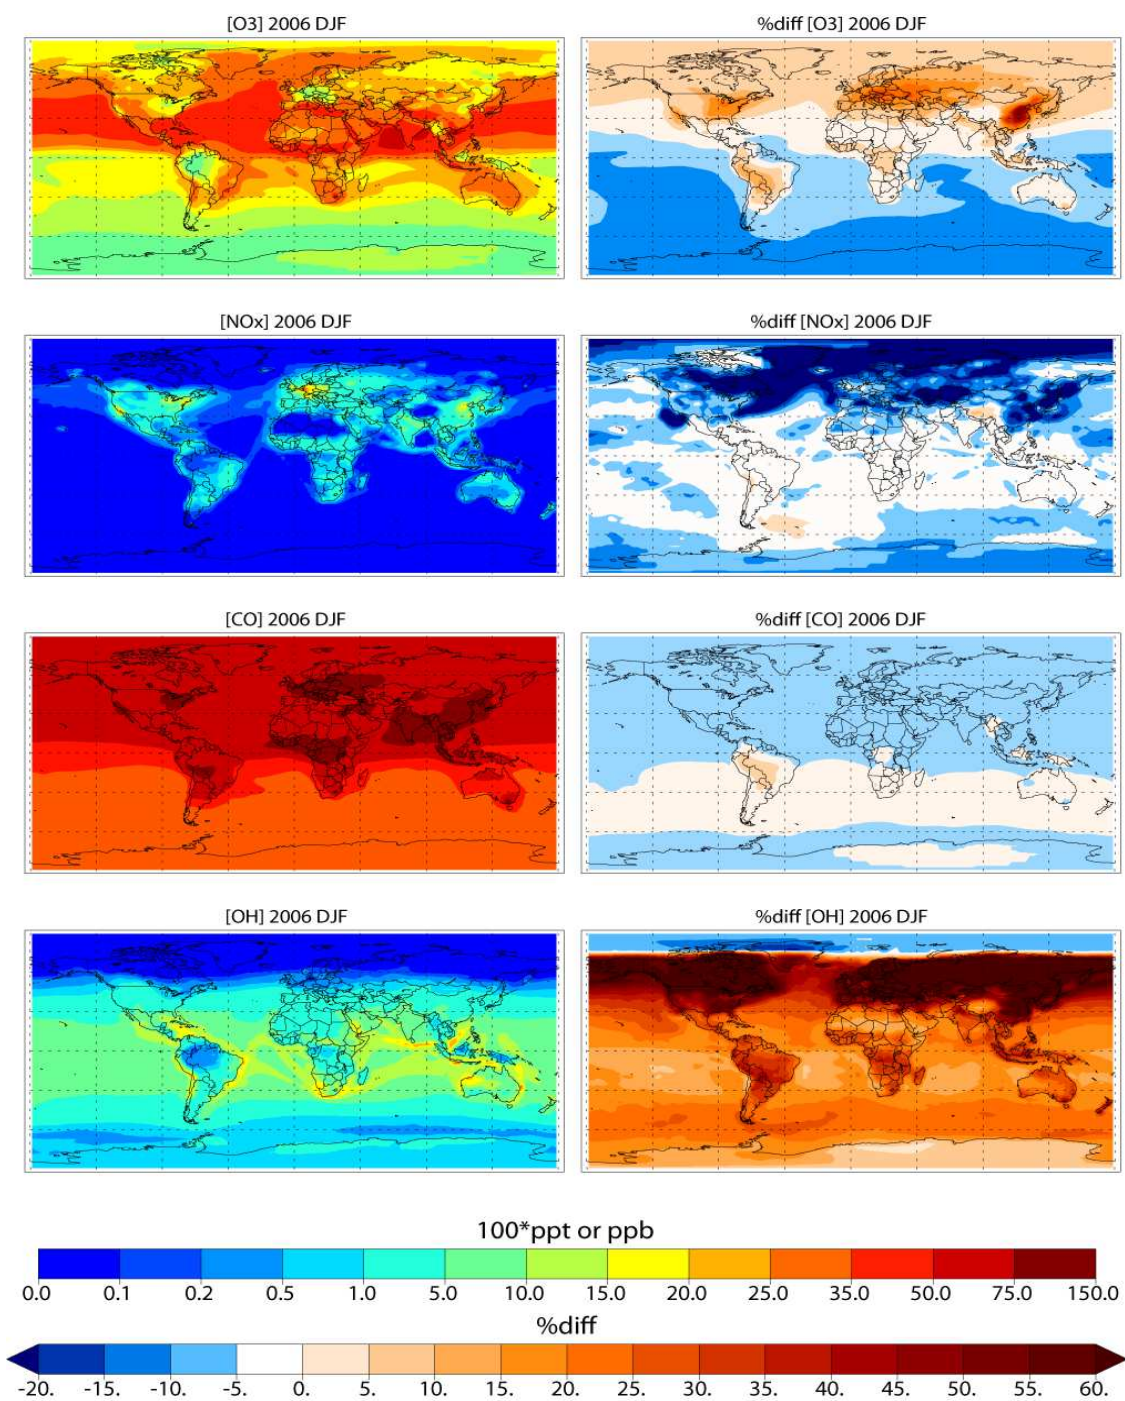

Figure S4a: Seasonal surface mixing ratios of O<sub>3</sub>, NO<sub>x</sub>, CO and OH for season DJF during 2006 as calculated by the MBA. The right panels show the corresponding percentage differences versus the BA, where the difference is calculated as  $2(MBA - BA) / (MBA - BA) * 100$ .



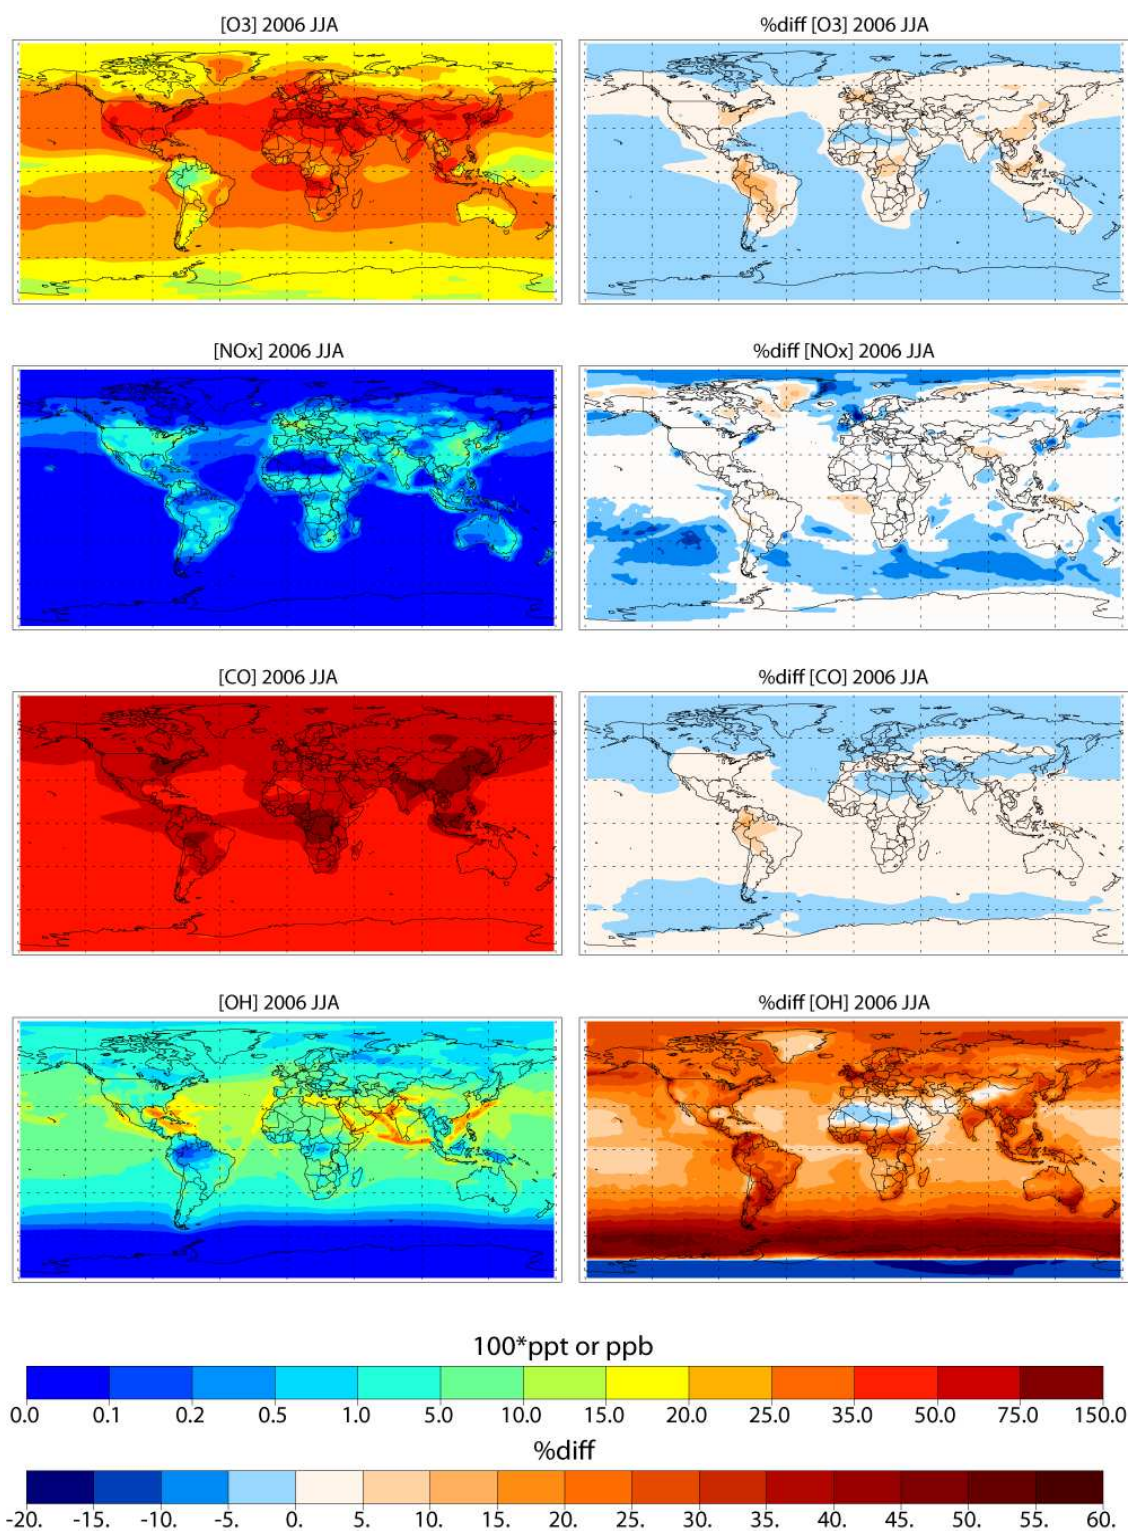

Figure S4b: As for Figure S4a except for season JJA.

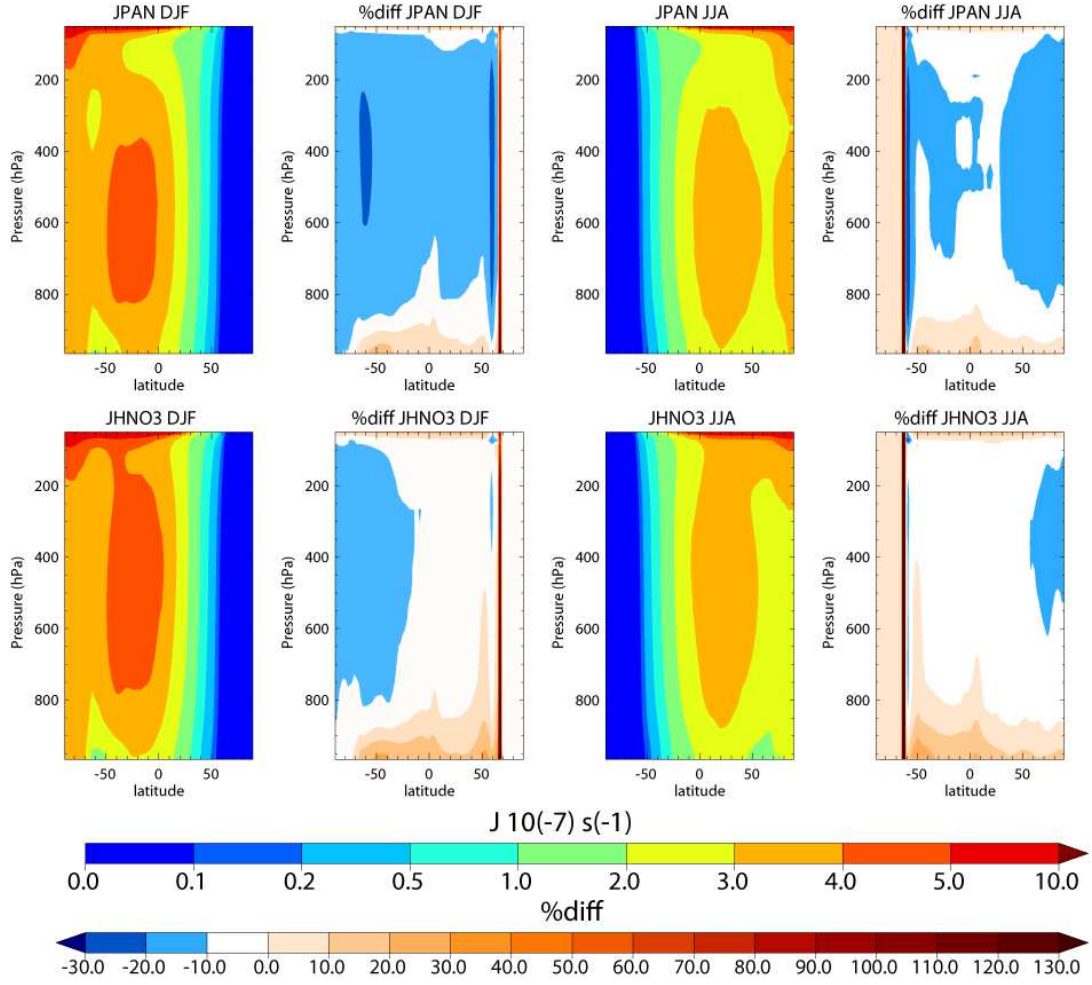

Figure S5: Seasonal zonal averages for  $J_{\text{HNO}_3}$  and  $J_{\text{PAN}}$  for seasons DJF (left) and JJA (right) as calculated online by the MBA. The corresponding percentage differences versus the BA, where the difference is calculated as  $(\text{MBA}-\text{BA})/(\text{BA}) \times 100$  are also shown.



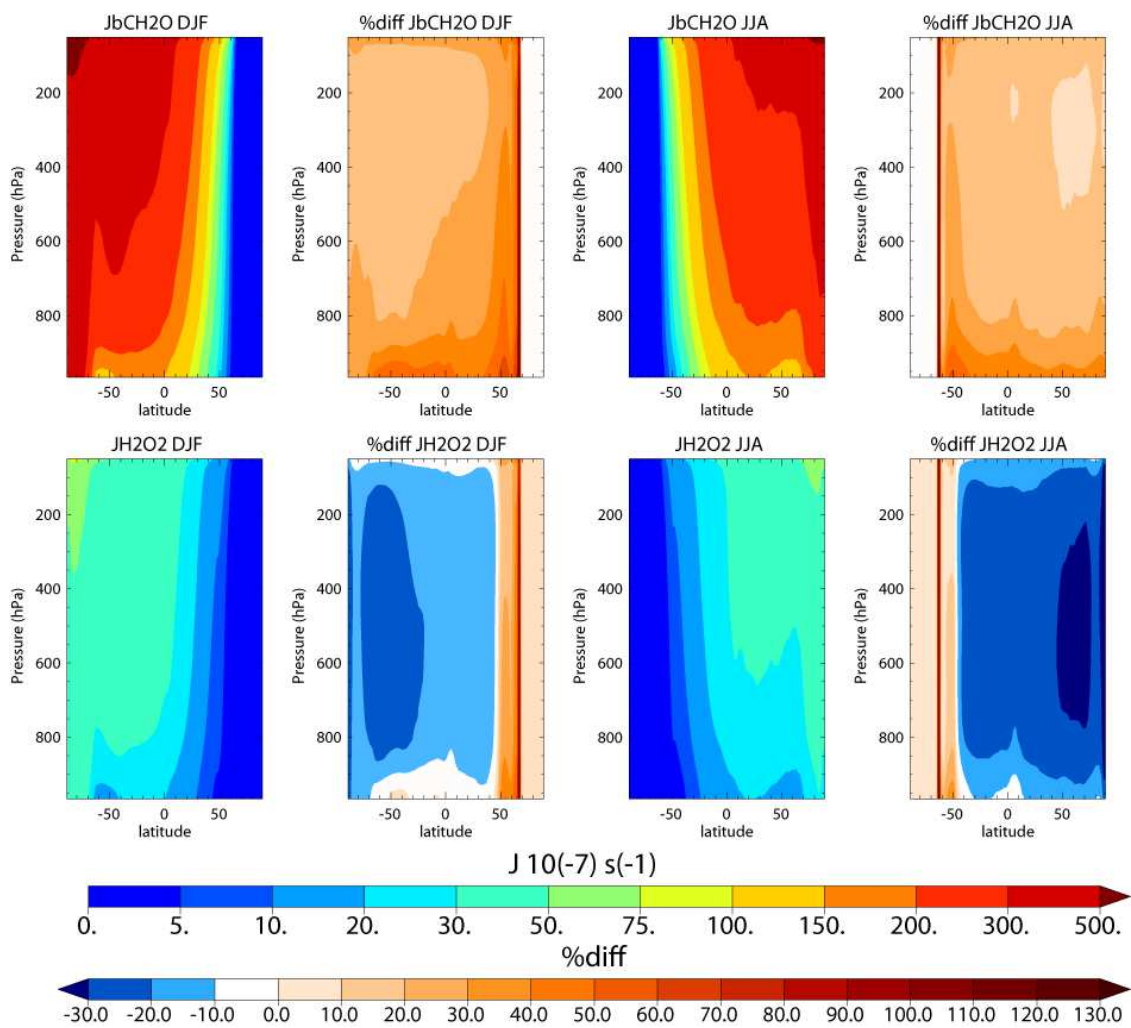

Figure S6: As for Figure S5 except for  $J_{bCH_2O}$  and  $J_{H_2O_2}$

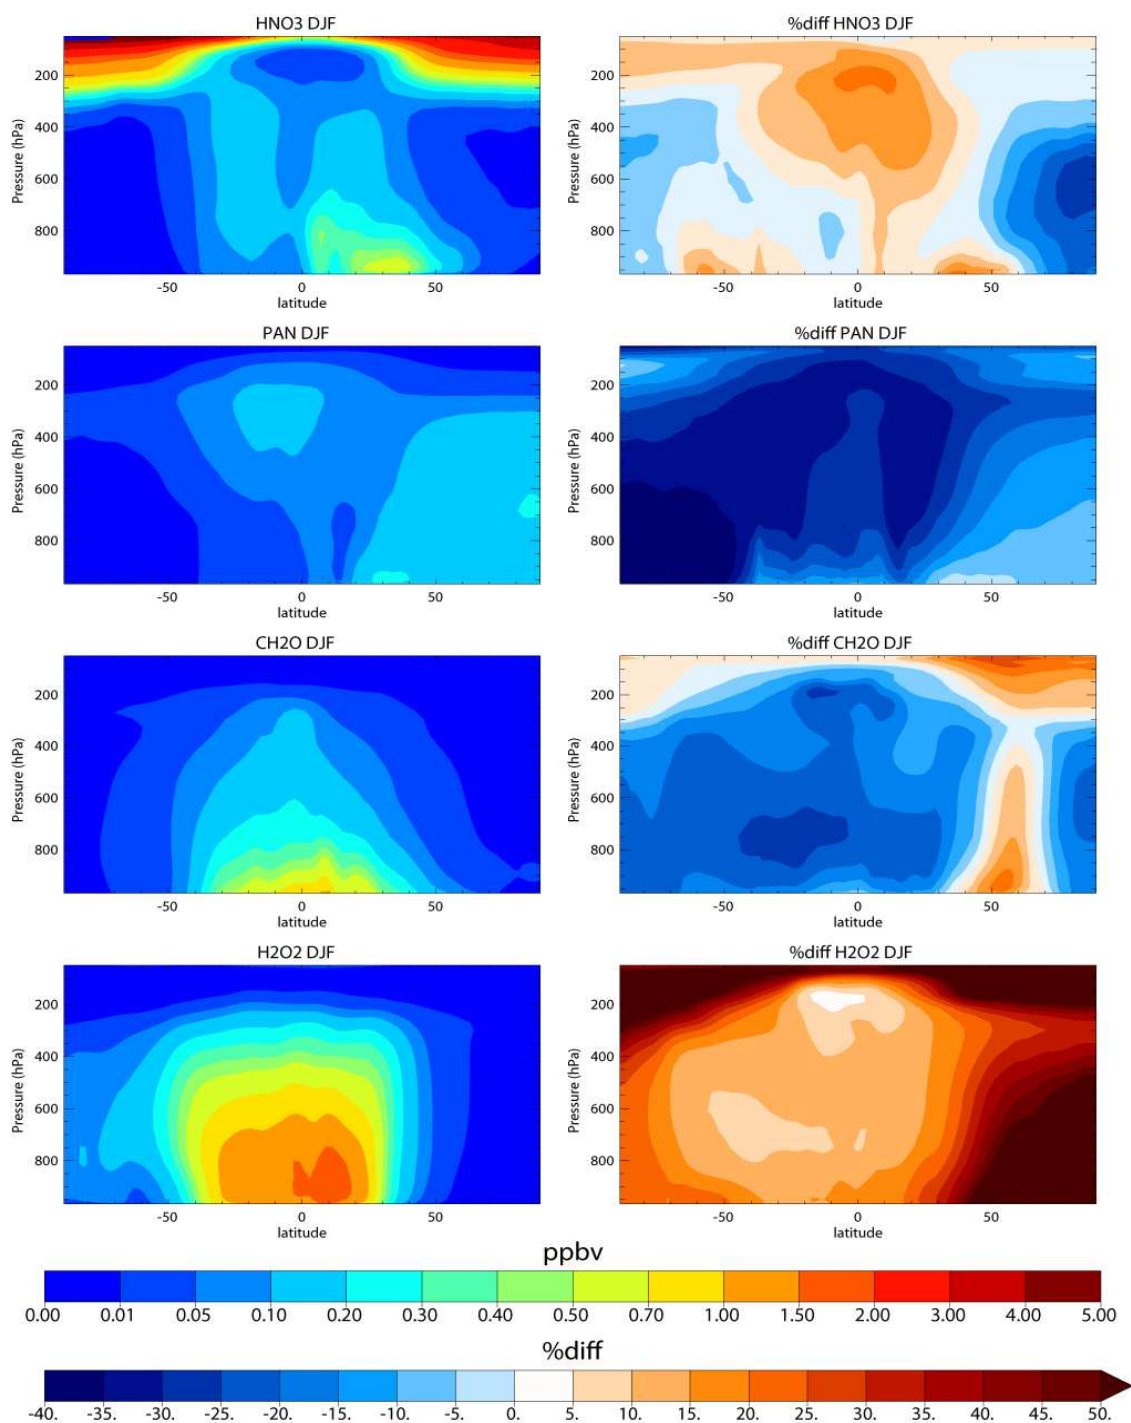

Figure S7a: The zonally averaged distribution of HNO<sub>3</sub>, PAN, CH<sub>2</sub>O and H<sub>2</sub>O<sub>2</sub> for season DJF during 2006 as calculated by the MBA. The right panels show the corresponding percentage differences against the BA, where the differences is calculated as  $2(\text{MBA}-\text{BA})/(\text{BA}+\text{MBA}) \times 100$ .

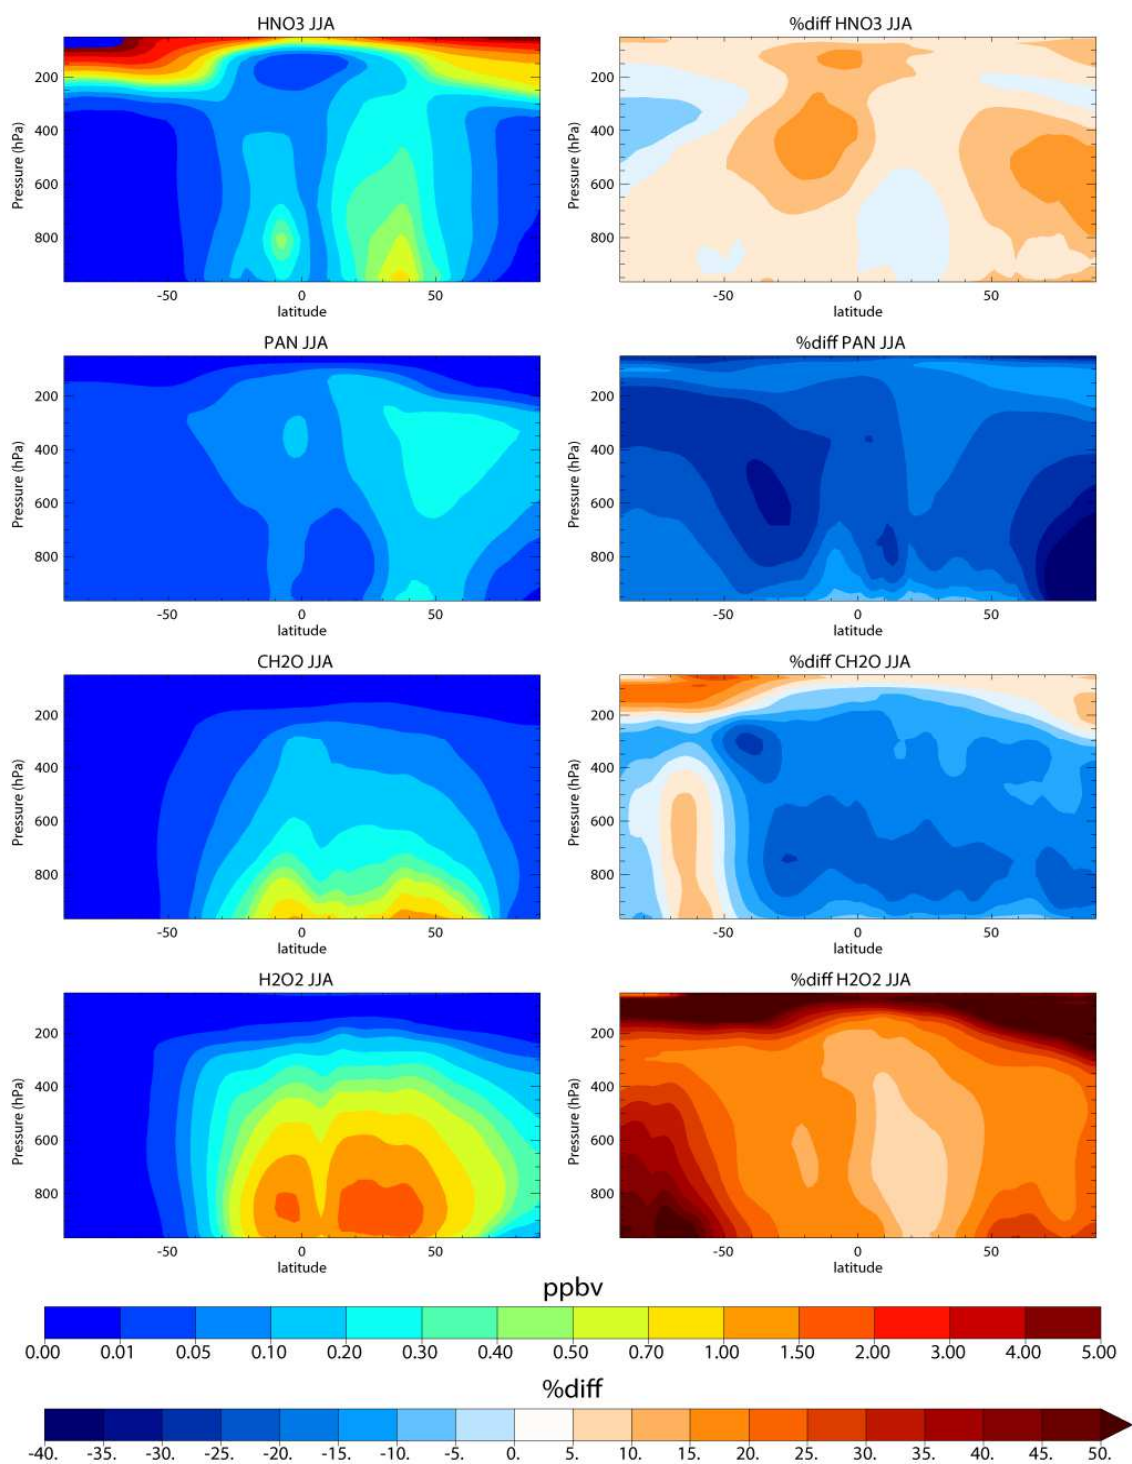

Figure S7b: As for Figure S7a except for season JJA.
